# Supplementary material for: Bromine and iodine determination in active pharmaceutical ingredients by ICP-MS
Source: Royal Society of Chemistry journal article supplement (doi:10.1039/c2ja30212h), 2012-01-01

## SUPPLEMENTARY INFORMATION

### Bromine and Iodine Determination in Active Pharmaceutical Ingredients by ICP-MS

Aline L. H. Muller, Paola A. Mello, Marcia F. Mesko, Fabio Andrei Duarte, Valderi Luiz

Dressler, Edson I. Muller, Erico M. M. Flores

#### 1. Steps of microwave-induced combustion method for active pharmaceutical ingredient (API) digestion and further determination of Br and I by ICP-MS and IC.

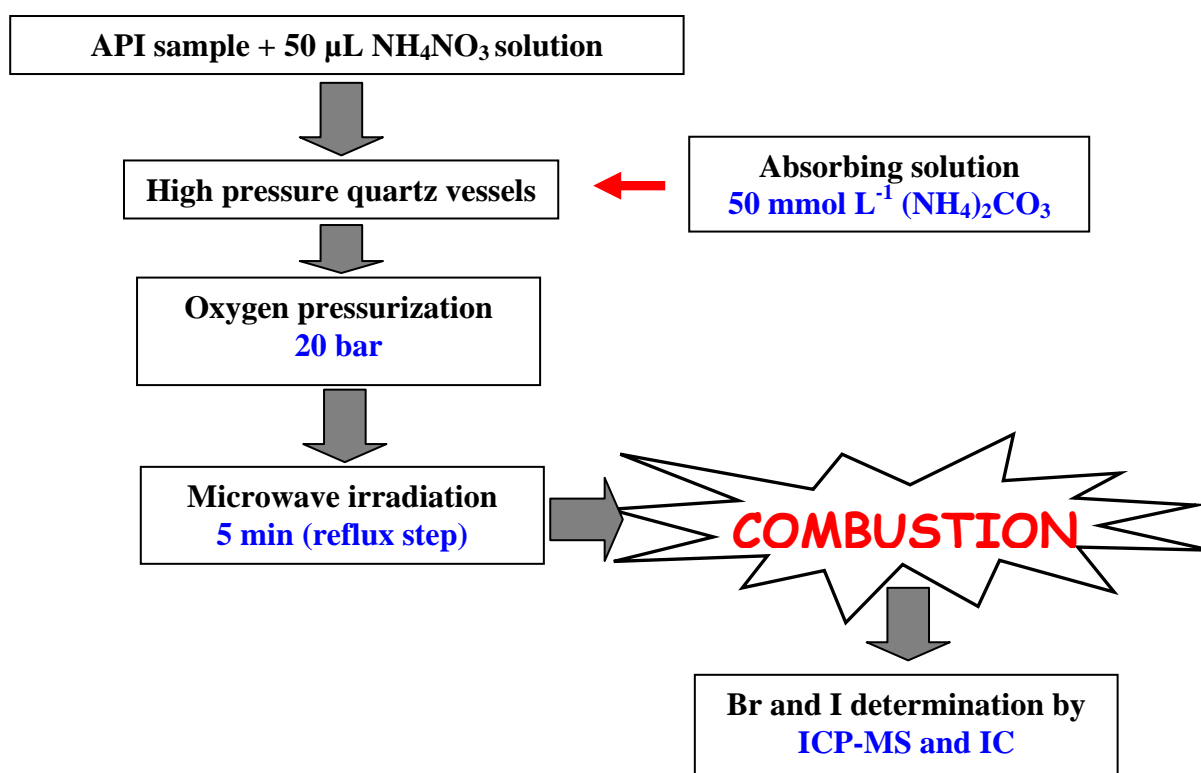

#### 2. API sample and sample pressed as pellet for MIC digestion positioned on the quartz holder.

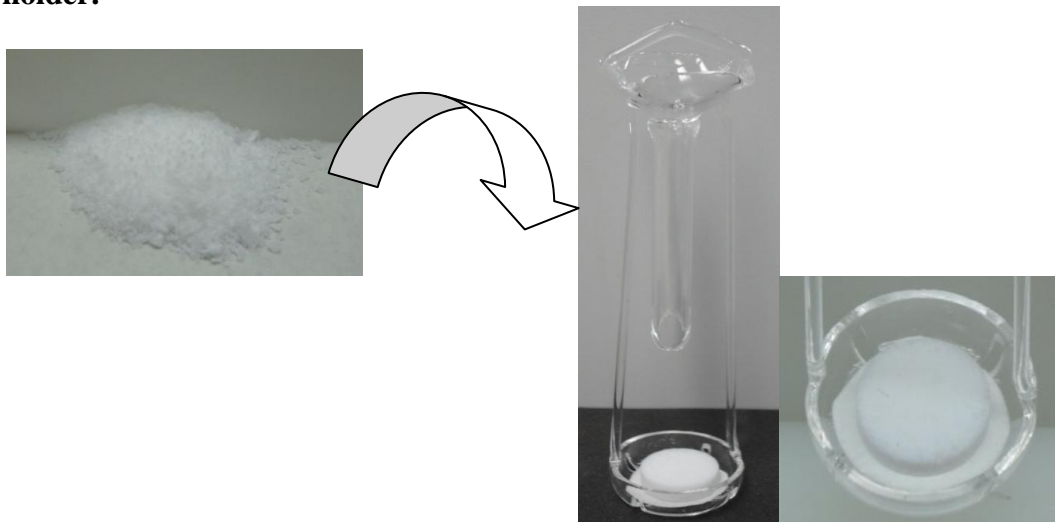

3. API combustion using MIC (500 mg of sample, 20 bar O<sub>2</sub>, 5 s of microwave irradiation, temperature of combustion ~ 1400°C). Figure A and B show the quartz vessel in the rotor and the detail of combustion of amoxicillin (500 mg), respectively.

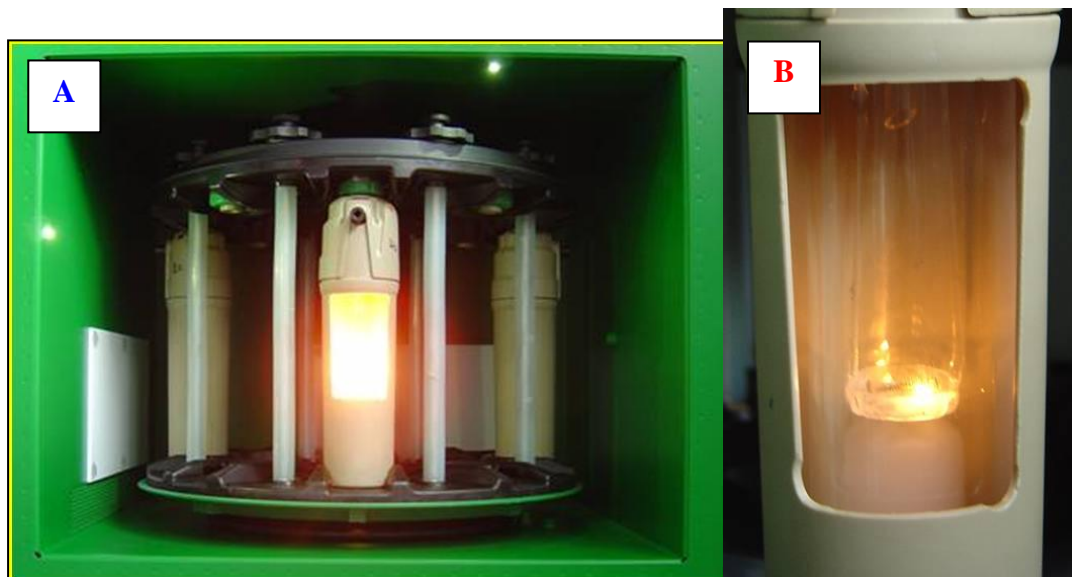

4. Aspect of final digests: A, after microwave-assisted alkaline extraction using 0.11 mol L<sup>-1</sup> TMAH and B, after microwave induced combustion using 50 mmol L<sup>-1</sup> (NH<sub>4</sub>)<sub>2</sub>CO<sub>3</sub> as absorbing solution (dilution to 30 mL with water).

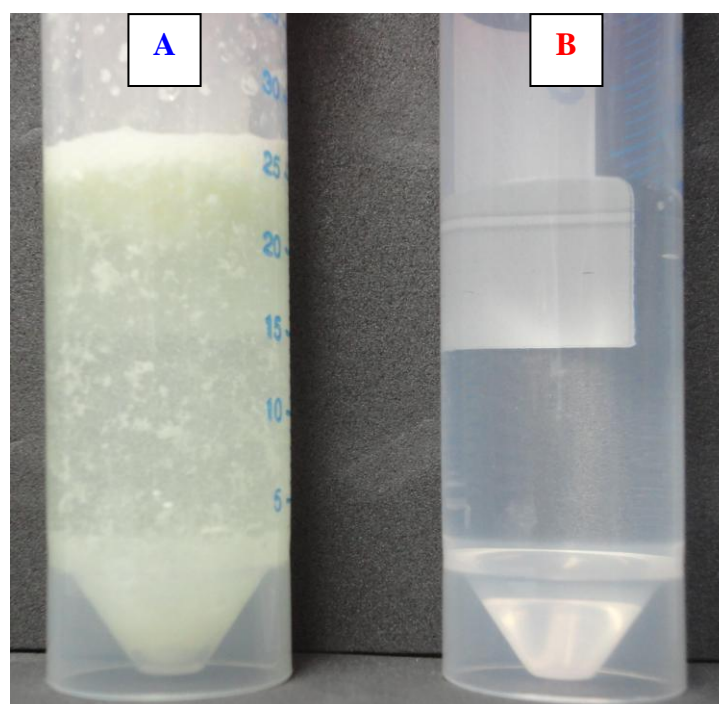

Supplement: c2ja30212h.pdf [file c2ja30212h.pdf]
